# Supplementary material
Source: publisher site journal article supplement (http://www.spandidos-publications.com/4397/downloadSupplementary)
Supplement: Supplementary file 1 [file downloadSupplementary]

Table SI. Functional role of lncRNAs in different experimental models.

| Models                        | Type                                          | Procedure                                                                                                                                                                                     | lncRNA expression | Effects                                                                                                                                                                              |
|-------------------------------|-----------------------------------------------|-----------------------------------------------------------------------------------------------------------------------------------------------------------------------------------------------|-------------------|--------------------------------------------------------------------------------------------------------------------------------------------------------------------------------------|
| Rat                           | MCAO/R model (54)                             | Middle cerebral artery obstruction (MCAO)/reperfusion (R) model was established in rats.                                                                                                      | MALAT1 ↑          | MALAT1 expression in the blood of rats with ischemic stroke was significantly higher than that of controls (P<0.01).                                                                 |
|                               | MCAO/R model (56)                             | MCAO/R model was established in rats.                                                                                                                                                         | MALAT1 ↑          | MALAT1 expression in the OGD/R model was significantly different (P<0.05) between different time points (12, 24 and 48 h).                                                           |
|                               | AMI model (95)                                | By blocking coronary arteries, the investigators established in male SD rats. (95)                                                                                                            | H19 ↑             | H19 overexpression significantly improved cardiac function (P<0.05).                                                                                                                 |
|                               | Myocardial ischemic preconditioning (IP) (99) | IP treatment of rat hearts, exposure of rat cells to H <sub>2</sub> O <sub>2</sub> pretreatment and hypoxic pretreatment of rat cardiomyocytes, respectively.                                 | H19 ↑             | IP significantly reduces subsequent damage from exposure to long-term I/R.                                                                                                           |
|                               | OGD / R (41)                                  | Primary cortical neurons were isolated from the cortex of adult male rats exposed to OGD / R.                                                                                                 | TUG1 ↑            | TUG1 was significantly elevated.                                                                                                                                                     |
| Mouse                         | Myocardial I / R mouse model (96)             | Expose cardiomyocytes to OGD/R.                                                                                                                                                               | H19 ↑             | Knockdown of H19 significantly reduced infarct size, increased left ventricular systolic pressure, and decreased left ventricular end-diastolic pressure.                            |
|                               | AMI mouse model (98)                          | Establishment of a myocardial infarction model in male mice by left anterior descending coronary artery ligation surgery and sham operation.                                                  | H19 ↑             | H19 robustly expresses in the hearts of 8-week-old mice. H19 promotes early cardiac dilation, fibrosis and extracellular matrix-related gene expression after myocardial infarction. |
| Patients with ischemic stroke | Blood (54)                                    |                                                                                                                                                                                               | MALAT1 ↑          | MALAT1 expression in the blood of ischemic stroke patients was significantly higher than that in control normal subjects. (P<0.001).                                                 |
|                               | Blood (41)                                    |                                                                                                                                                                                               | TUG1 ↑            | TUG1 was significantly elevated in the blood of subjects tested by RT-PCR (P<0.001).                                                                                                 |
| Cell models                   | OGD/R model (57)                              | HT22 cells were cultured in glucose-free medium under hypoxic conditions for 4 h at 37°C. After OGD, cells were incubated in intact medium under normoxic conditions for 12 h, 24 h and 48 h. | MALAT1 ↑          | MALAT1 levels increased in a time-dependent manner and showed a significant increase at 48 h after reoxygenation.                                                                    |
